# Supplementary material for: Modeled variations in the inherent optical properties of summer Arctic ice and their effects on the radiation budget: a case based on ice cores from 2008 to 2016
Source: Copernicus journal article supplement (doi:10.5194/tc-18-273-2024), 2024-01-12
Supplement: Supplementary file [file tc-18-273-2024-supplement.pdf]

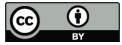

*Supplement of*

**Modeled variations in the inherent optical properties of summer Arctic ice and their effects on the radiation budget: a case based on ice cores from 2008 to 2016**

**Miao Yu et al.**

*Correspondence to:* Peng Lu (lupeng@dlut.edu.cn) and Zhijun Li (lizhijun@dlut.edu.cn)

The copyright of individual parts of the supplement might differ from the article licence.

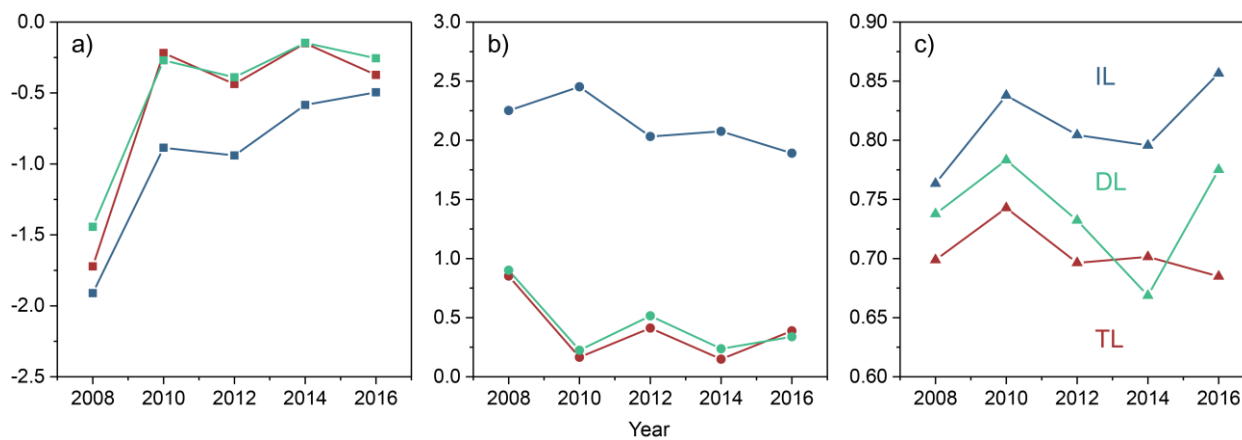

**Figure S1: a) Temperature, b) salinity, and c) density of top layer (TL), drainage layer (DL), and interior layer (IL) of ice cores during 2008-2016.**

5

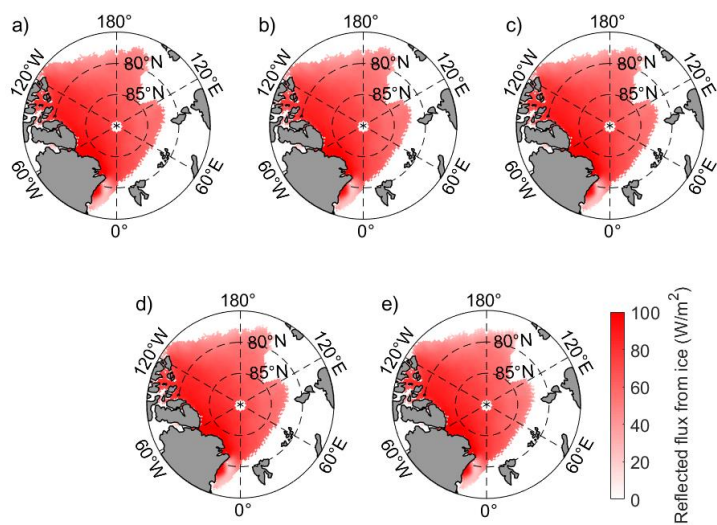

**Figure S2: Distribution of reflected solar radiation by sea ice in the summers of (a) 2008, (b) 2010, (c) 2012, (d) 2014, and (e) 2016 when sea ice thickness was on the decrease.**
